# Supplementary material for: Optical temperature-sensing phosphors with high sensitivities in a wide temperature range based on different strategies
Source: Royal Society of Chemistry journal article supplement (doi:10.1039/d3dt01291c), 2023-01-01
Supplement: d3dt01291c1.pdf [file d3dt01291c1.pdf]

## Supporting Information

Optical temperature-sensing phosphors with high sensitivities in a wide temperature range based on different strategies

Songsong An, Jia Zhang\*, Zhenghe Hua, Jiajun Chen

Physics department and Jiangsu Key Laboratory of Modern Measurement Technology and Intelligence, Huaiyin Normal University, 111 West Chang Jiang Road, Huai'an 223300, China

\*Corresponding author. E-mail address: zhangjianew@126.com

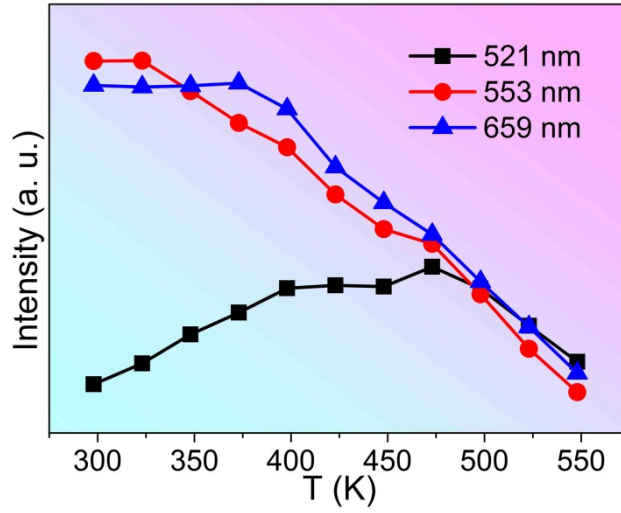

Fig. S1 Dependences of intensities of 521, 553 and 659 nm emissions on absolute temperature

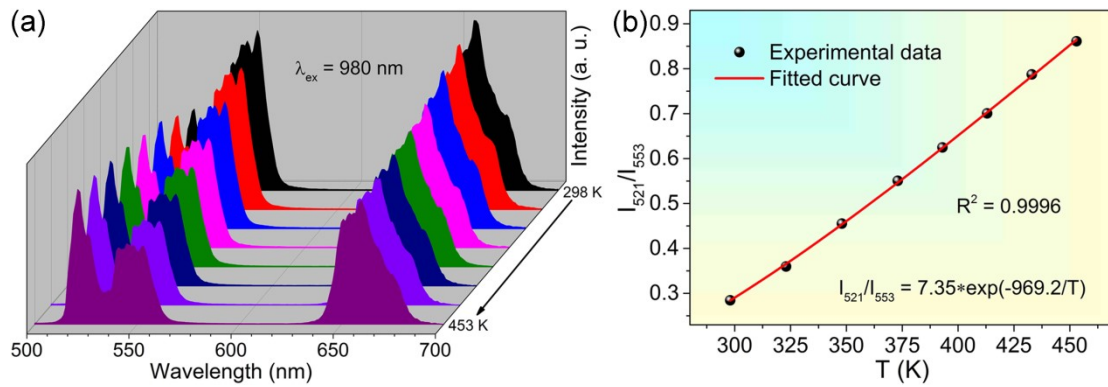

Fig. S2 (a) Emission spectra of the fabricated device excited by 980 nm light of 0.95 W/cm<sup>2</sup> at various temperatures. (b) Dependence of  $I_{521}/I_{553}$  on absolute temperature.

Table S1 Amounts of the starting materials used for LS host and LS:10%Yb<sup>3+</sup>,xEr<sup>3+</sup>

(0.5 ≤ x ≤ 3%)

| Concentration | La <sub>2</sub> O <sub>3</sub> (g) | SiO <sub>2</sub> (g) | Yb <sub>2</sub> O <sub>3</sub> (g) | Er <sub>2</sub> O <sub>3</sub> (g) |
|---------------|------------------------------------|----------------------|------------------------------------|------------------------------------|
| host          | 0.8076                             | 0.1941               | 0                                  | 0                                  |
| x = 0.5%      | 0.7228                             | 0.1941               | 0.1559                             | 0.0047                             |
| x = 1%        | 0.7188                             | 0.1941               | 0.1559                             | 0.0094                             |
| x = 2%        | 0.7107                             | 0.1941               | 0.1559                             | 0.0188                             |
| x = 3%        | 0.7026                             | 0.1941               | 0.1559                             | 0.0282                             |

Table S2 Amounts of the starting materials used for LS:10%Yb<sup>3+</sup>,xTm<sup>3+</sup> (0.25% ≤ x ≤

1%)

| Concentration | La <sub>2</sub> O <sub>3</sub> (g) | SiO <sub>2</sub> (g) | Yb <sub>2</sub> O <sub>3</sub> (g) | Tm <sub>2</sub> O <sub>3</sub> (g) |
|---------------|------------------------------------|----------------------|------------------------------------|------------------------------------|
| y = 0.25%     | 0.7248                             | 0.1941               | 0.1559                             | 0.0024                             |
| y = 0.5%      | 0.7228                             | 0.1941               | 0.1559                             | 0.0048                             |
| y = 0.75%     | 0.7208                             | 0.1941               | 0.1559                             | 0.0072                             |
| y = 1%        | 0.7188                             | 0.1941               | 0.1559                             | 0.0096                             |

Table S3  $\tau_i$  and  $A_i$  ( $i = 1, 2$ ) values for decay curves of LS:10%Yb<sup>3+</sup>,yTm<sup>3+</sup> (0.25% ≤ y

≤ 1%) by monitoring 474 nm

| y (%) | $\tau_1$ (μs) | $\tau_2$ (μs) | $A_1$  | $A_2$  |
|-------|---------------|---------------|--------|--------|
| 0.25  | 90.5          | 264.6         | 8946.8 | 1271.8 |
| 0.5   | 64.3          | 214.5         | 8567.7 | 1232.2 |
| 0.75  | 45.8          | 174.7         | 9437.2 | 828.9  |
| 1     | 41.4          | 161.1         | 8355.2 | 805.8  |

Table S4  $\tau_i$  and  $A_i$  ( $i = 1, 2$ ) values for decay curves of LS:10%Yb<sup>3+</sup>,yTm<sup>3+</sup> ( $0.25\% \leq y \leq 1\%$ ) by monitoring 790 nm

| y (%) | $\tau_1$ ( $\mu$ s) | $\tau_2$ ( $\mu$ s) | $A_1$  | $A_2$ |
|-------|---------------------|---------------------|--------|-------|
| 0.25  | 117.3               | 379.5               | 9964.9 | 33.2  |
| 0.5   | 97.0                | 374.1               | 9720.6 | 40.5  |
| 0.75  | 56.4                | 113.4               | 8073.1 | 981.0 |
| 1     | 54.8                | 114.8               | 8610.7 | 849.7 |

Table S5  $\tau_i$  and  $A_i$  ( $i = 1, 2$ ) values for decay curves of LS:10%Yb<sup>3+</sup>,2%Er<sup>3+</sup> by monitoring 553 nm at various temperatures

| T   | $\tau_1$ ( $\mu$ s) | $\tau_2$ ( $\mu$ s) | $A_1$  | $A_2$  |
|-----|---------------------|---------------------|--------|--------|
| 25  | 43.5                | 95.3                | 3267.7 | 6300.2 |
| 75  | 44.9                | 95.6                | 2967.2 | 5886.9 |
| 125 | 46.1                | 96.5                | 3398.7 | 5773.3 |
| 175 | 42.1                | 90.6                | 3463.0 | 5978.2 |
| 225 | 37.8                | 89.3                | 3331.8 | 5881.7 |

Table S6  $\tau_i$  and  $A_i$  ( $i = 1, 2$ ) values for decay curves of LS:10%Yb<sup>3+</sup>,2%Er<sup>3+</sup> by monitoring 659 nm at various temperatures

| T   | $\tau_1$ ( $\mu$ s) | $\tau_2$ ( $\mu$ s) | $A_1$  | $A_2$ |
|-----|---------------------|---------------------|--------|-------|
| 25  | 193.4               | 1907.8              | 9693.1 | 13.4  |
| 75  | 187.8               | 1833.2              | 9406.4 | 12.9  |
| 125 | 184.8               | 1724.1              | 9170.6 | 11.8  |
| 175 | 175.8               | 1961.4              | 9322.1 | 18.2  |
| 225 | 177.3               | 1965.2              | 9401.2 | 11.3  |
